# Supplementary material for: The cytotoxic and apoptotic effects of Ferulago W. Koch extracts on various cancer cell lines
Source: publisher site journal article supplement (doi:10.1515/tjb-2020-0225), 2020-10-15
Supplement: Supplementary file 1 [file j_tjb-2020-0225_suppl.docx]

**Supplementary Table 1.** Collection localities of *Ferulago* species.

| Species | Collection Locality |
| --- | --- |
| *F. cassia* (F.c) | C3: Konya: Beysehir, 1555 m, 20/6/2016 (37° 13.785´N / 31° 5.537´W) |
| *F. isaurica* (F.i) | C4: Antalya-Alanya, 837 m, 21/6/2016 (36° 39.095´ / 32° 7.497´W) |
| *F. syriaca* (F.syr) | C6: Hatay: Harbiye-Senköy road, 452 m, 22/6/2016 (36° 7.194´N / 36° 9.988´W) |
| *F. longistylis* (F.l) | B7: Erzincan-Refahiye road, Sakaltutan locality, 2030 m, 13/7/2016 (39° 52.885´N / 39° 9.292´W) |
| *F. setifolia* (F.se) | B7: Erzincan: Uzumlu district, Karakaya Town, 2100 m, 2047 m, 14/7/2016 (39° 42.127´N / 39° 45.874´W) |
